# Supplementary material
Source: PubMed Central journal article supplement (PMC8246619)
Supplement: nqab037_supplemental_file.pdf [file nqab037_supplemental_file.pdf]

**Genetically determined Short-Chain Fatty Acid level modifies the association of dietary fiber intake in changes in BMD during weight loss: The POUNDS lost trial**

Tao Zhou<sup>1,2</sup>, Dianjianyi Sun<sup>2,3</sup>, Xiang Li<sup>2</sup>, Yoriko Heianza<sup>2</sup>, Meryl S. LeBoff<sup>4</sup>,  
George A. Bray<sup>5</sup>, Frank M. Sacks<sup>6</sup>, Lu Qi<sup>2,6</sup>

<sup>1</sup>School of Public Health (Shenzhen), Sun Yat-sen University, Guangzhou,  
Guangdong 510006, China

<sup>2</sup>Department of Epidemiology, School of Public Health and Tropical Medicine,  
Tulane University, New Orleans, LA

<sup>3</sup>Department of Epidemiology and Biostatistics, School of Public Health, Peking  
University Health Science Center, Beijing, China

<sup>4</sup>Department of Medicine, Brigham and Women's Hospital, Boston, MA.

<sup>5</sup>Pennington Biomedical Research Center, Louisiana State University, Baton Rouge,  
LA

<sup>6</sup>Department of Nutrition, Harvard TH Chan School of Public Health, Boston, MA

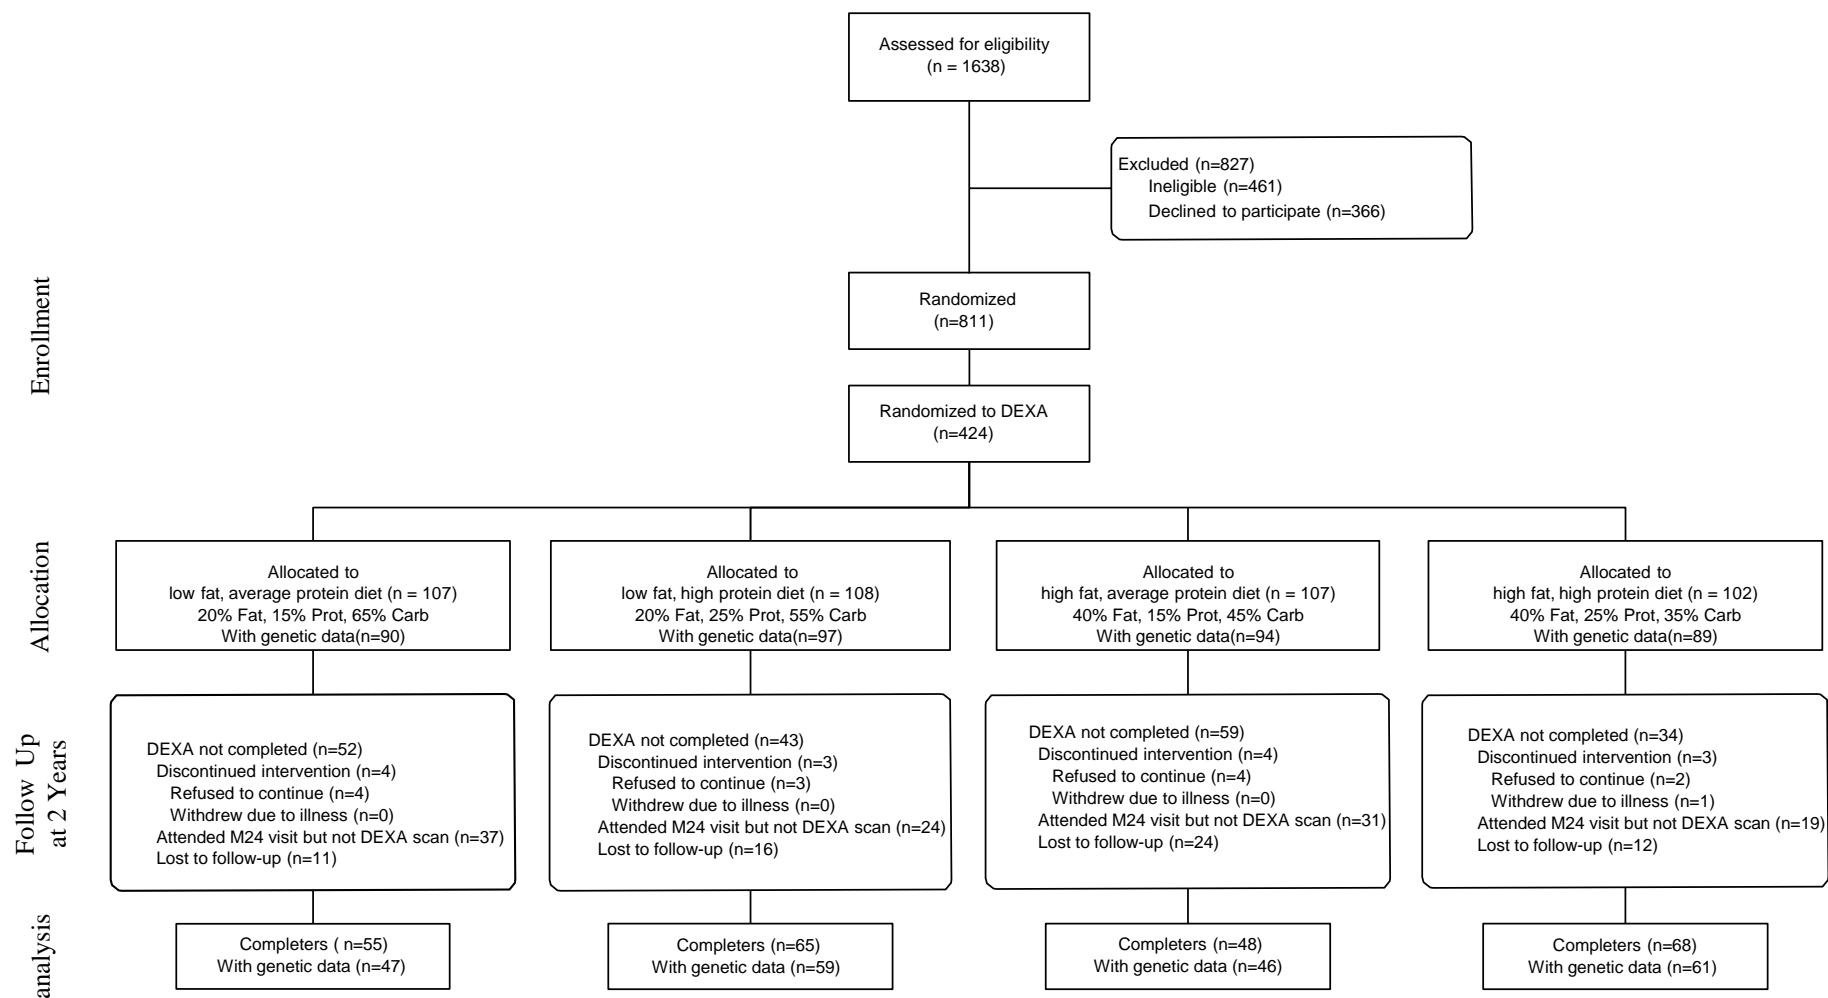

**Supplementary Figure 1. Participant Flowchart\***

\*This flowchart was cited from Sacks, Frank M et al. NEJM, 2009; de Souza et al. AJCN. 2012.
